# Supplementary material for: Health related quality of life is associated with gastroesophageal reflux symptoms in overweight children
Source: publisher site journal article supplement (doi:10.1515/jpem-2023-0315), 2023-11-09
Supplement: Supplementary file 1 [file j_jpem-2023-0315_suppl_001.docx]

**Supplementary Material**

Supplementary Table 1: Health related quality of life in children with or without overweight and GERD symptoms (median, IQR)

|  | **Overweight children with GERD symptoms**  **(n=14)** | **Overweight children without GERD symptoms**  **(n=34)** | **Normal weight with GERD symptoms**  **(n=16)** | **Normal weight without GERD symptoms**  **(n=43)** | **Overweight children vs. normal weight with GERD symptoms** | **Overweight children with or without GERD symptoms** | **Normal weight without GERD symptoms vs. overweight children with GERD symptoms** |
| --- | --- | --- | --- | --- | --- | --- | --- |
| **PedsQoL-total** | 69.0 (63.0-80.4) | 85.3 (75.3-94.4) | 85.3 (74.5-92.4) | 89.1 (81.5-94.6) | 0.011* | 0.021* | 0.001*** |
| **PedsQoL-Physical function** | 81.25 (60.2-91.4) | 90.6 (80.5-100.0) | 90.6 (82.0-93.8) | 93.8 (87.5-100.0) | 0.083 | 0.049* | 0.003* |
| **PedsQoL-Emotional function** | 67.5 (48.8—80.0) | 80.0 (63.8-90.0) | 70.0 (48.8-88.8) | 85.0 (70.0-100.0) | 0.716 | 0.066 | 0.008* |
| **PedsQoL-Social function** | 80.0 (73.8-100.0) | 95.0 (75.0-100.0) | 100.0 (96.3-100.0) | 95.0  (85.0-100.0) | 0,005* | 0.229 | 0.042* |
| **PedsQoL-School function** | 60.0 (53.8-68.8) | 83.1 (70.0-90.0) | 82.5 (70-91.3) | 80.0 (70.0-95.0) | 0,003** | 0.001* | 0,001* |
